# Supplementary material for: Facile formation of barium titanium oxyhydride on a titanium hydride surface as an ammonia synthesis catalyst
Source: Royal Society of Chemistry journal article supplement (doi:10.1039/d3ra01539d), 2023-01-01
Supplement: d3ra01539d1.pdf [file d3ra01539d1.pdf]

Supplementary Information for

# Facile formation of barium titanium oxyhydride on a titanium hydride surface as an ammonia synthesis catalyst

Yoshihiro Goto,<sup>\*a</sup> Masashi Kikugawa,<sup>a</sup> Keisuke Kobayashi,<sup>b</sup> Yuichi Manaka,<sup>b</sup> Tetsuya Nanba,<sup>b</sup> Hideyuki Matsumoto,<sup>b,c</sup> Mitsuru Matsumoto,<sup>a</sup> Masakazu Aoki,<sup>a</sup> and Haruo Imagawa<sup>a</sup>

<sup>a</sup> Toyota Central R&D Labs., Inc., 41-1 Yokomichi, Nagakute, Aichi 480-1192, Japan.

<sup>b</sup> Renewable Energy Research Center, National Institute of Advanced Industrial Science and Technology, 2-2-9 Machiikedai, Koriyama, Fukushima 963-0298, Japan.

<sup>c</sup> Department of Chemical Science and Engineering, School of Materials and Chemical Technology, Tokyo Institute of Technology, 2-12-1 Ookayama, Meguro-ku, Tokyo, 152-8552, Japan.

## 1. Supplementary figures

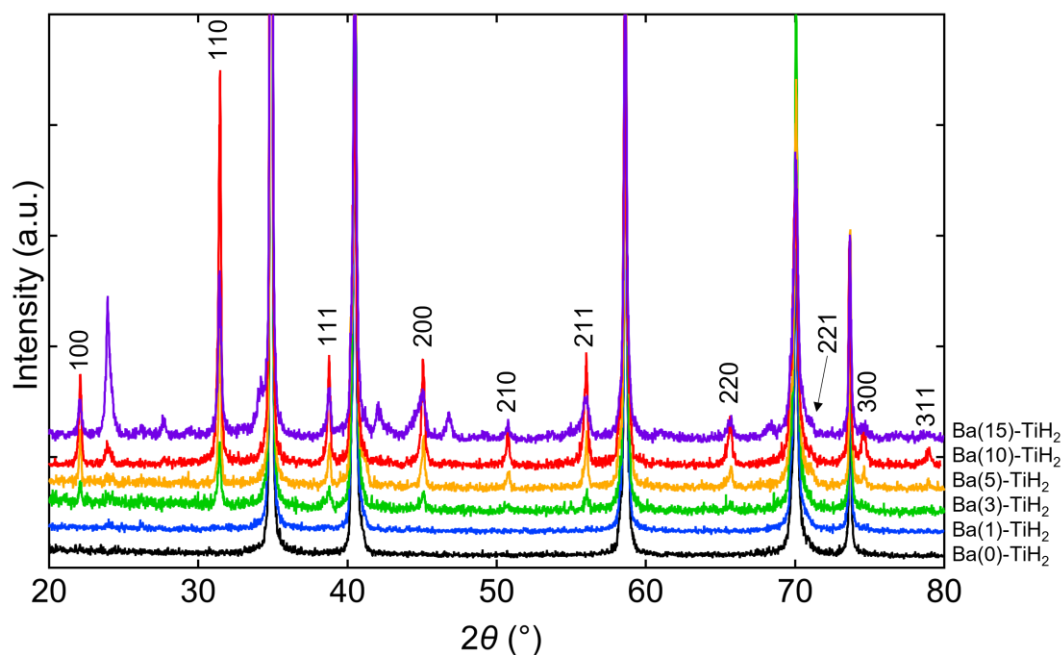

Fig. S1. Expanded XRD patterns of Ba( $\alpha$ )-TiH<sub>2</sub> ( $\alpha = 0, 1, 3, 5, 10,$  and  $15$ ) with Bragg reflections attributed to BaTiO<sub>2.5</sub>H<sub>0.5</sub>.

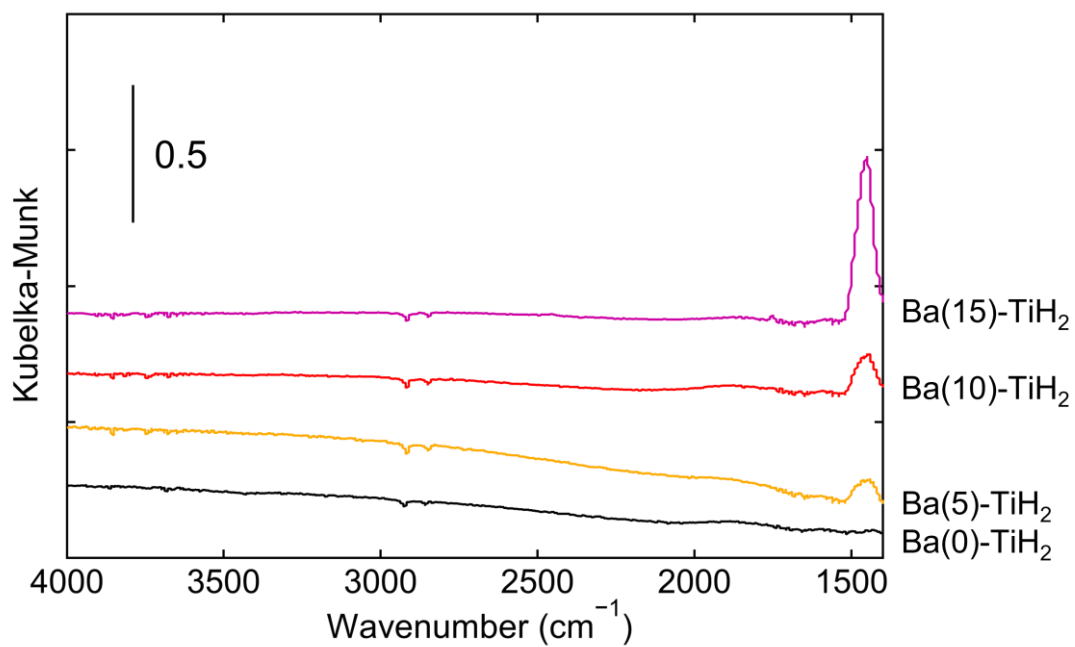

Fig. S2. FT-IR spectra of Ba( $\alpha$ )-TiH<sub>2</sub> ( $\alpha = 0, 5, 10, \text{ and } 15$ ) at 50 °C in flowing He. Samples were pretreated at 200 °C for 40 min in flowing He prior to analysis. Peaks at around 1450 cm<sup>-1</sup> are assigned to the CO<sub>3</sub><sup>2-</sup> ions of BaCO<sub>3</sub>.<sup>S1</sup>

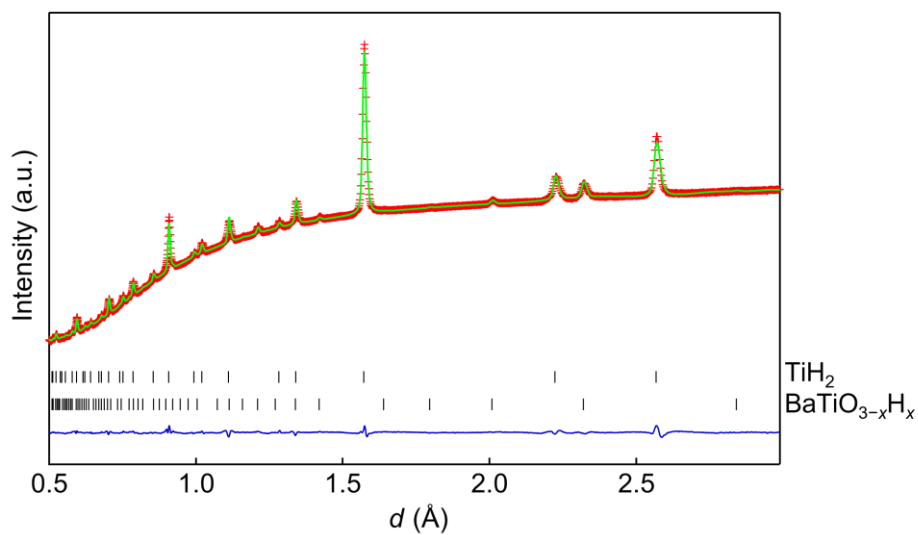

Fig. S3. Rietveld refinement profile for the ND pattern of Ba(10)-TiH<sub>2</sub>. The red crosses, green solid line, and blue solid line correspond to observed and calculated intensities and their differences, respectively. The black ticks highlight the positions of the peaks corresponding to TiH<sub>2</sub> and BaTiO<sub>3-x</sub>H<sub>x</sub>.

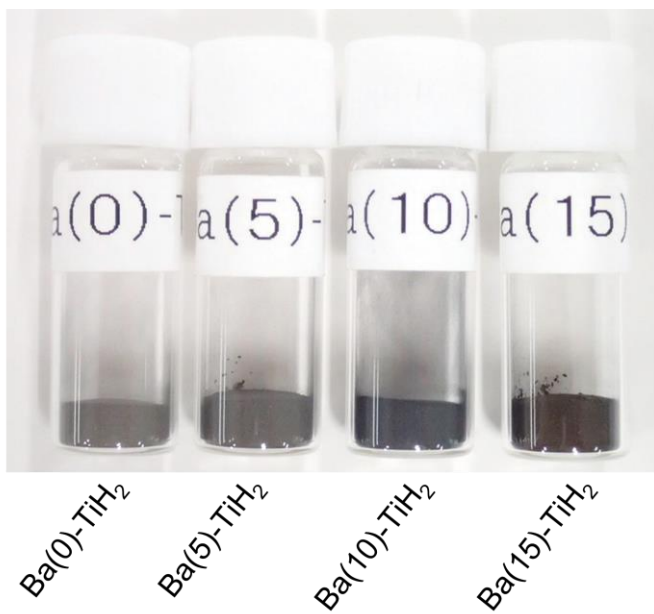

Fig. S4. Color changes accompanying the formation of  $\text{BaTiO}_{2.5}\text{H}_{0.5}$  and  $\text{BaCO}_3$  on the  $\text{TiH}_2$  surface.

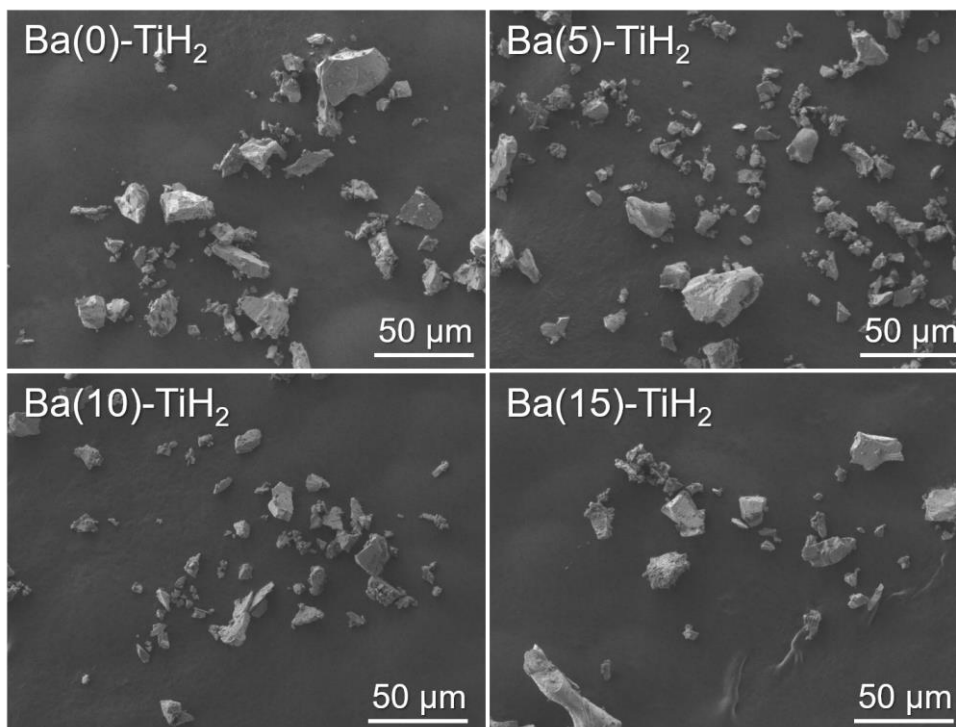

**Fig. S5.** Scanning electron microscopy (SEM) images of  $\text{Ba}(\alpha)\text{-TiH}_2$  ( $\alpha = 0, 5, 10,$  and  $15$ ) at  $500\times$  magnification.

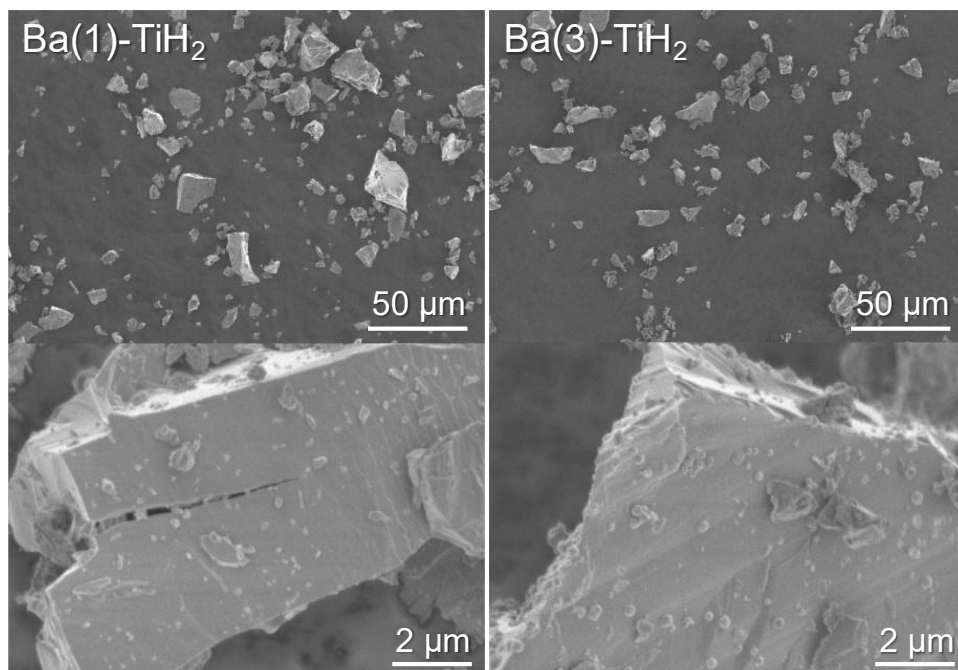

**Fig. S6.** Scanning electron microscopy (SEM) images of Ba( $\alpha$ )-TiH<sub>2</sub> ( $\alpha$  = 1 and 3) at 500 $\times$  and 10000 $\times$  magnifications.

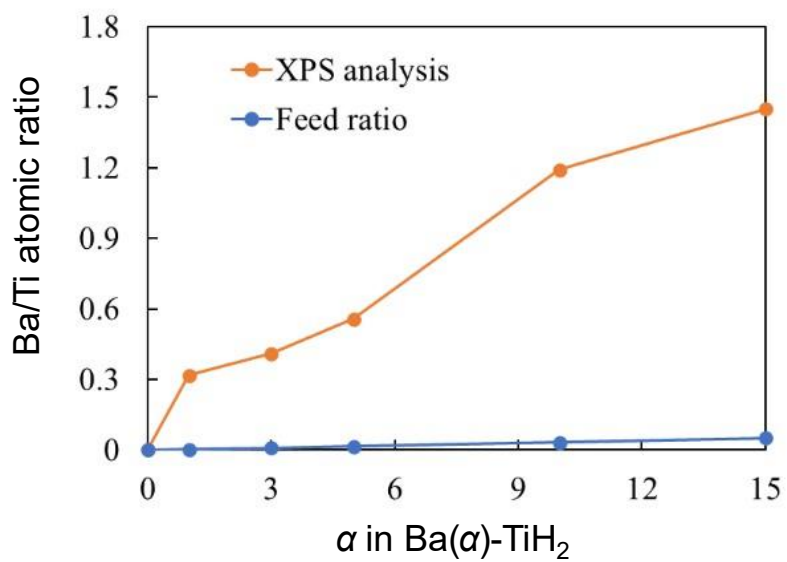

**Fig. S7.** Ba/Ti atomic ratio of  $\text{Ba}(\alpha)\text{-TiH}_2$  ( $\alpha = 0, 1, 3, 5, 10,$  and  $15$ ) estimated from XPS analysis and the feed ratio.

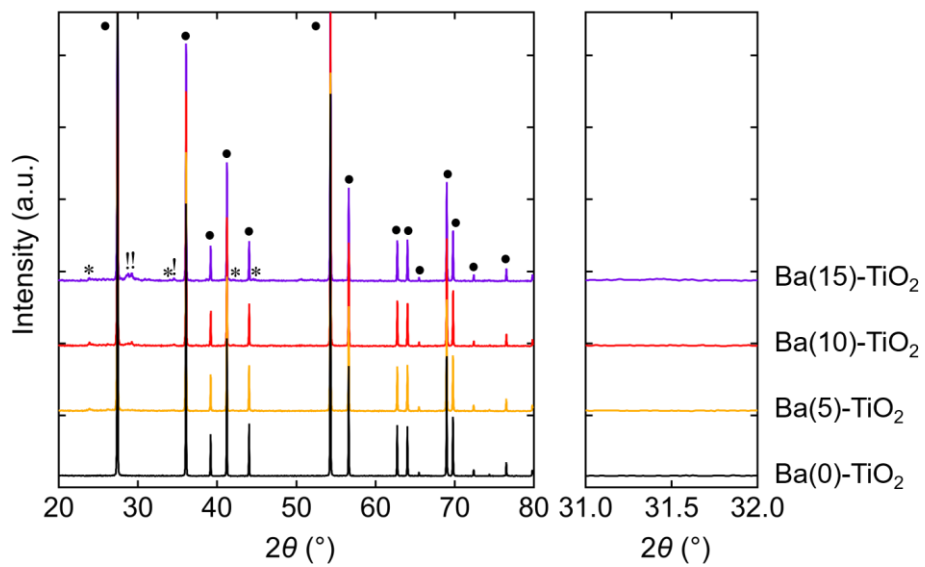

**Fig. S8.** XRD patterns of Ba( $\alpha$ )-TiO<sub>2</sub> ( $\alpha = 0, 5, 10,$  and  $15$ ). Circles (●), exclamation marks (!), and asterisks (\*) indicate peaks arising from rutile TiO<sub>2</sub>, Ba<sub>2</sub>TiO<sub>4</sub>, and BaCO<sub>3</sub>, respectively.



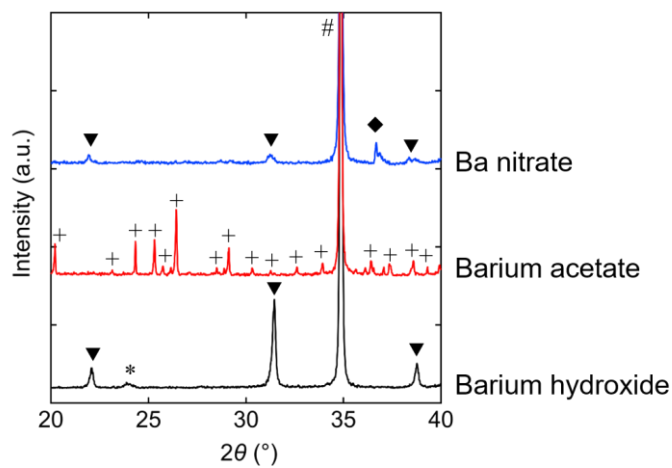

**Fig. S9.** XRD patterns of Ba(10)-TiH<sub>2</sub> prepared from various barium reagents. Hashtags (#), triangles (▼), asterisks (\*), pluses (+), and squares indicate peaks arising from TiH<sub>2</sub>, BaTiO<sub>2.5</sub>H<sub>0.5</sub>, BaCO<sub>3</sub>, Ba(CH<sub>3</sub>COO)<sub>2</sub>, and Ba(NO<sub>3</sub>)<sub>2</sub>, respectively.

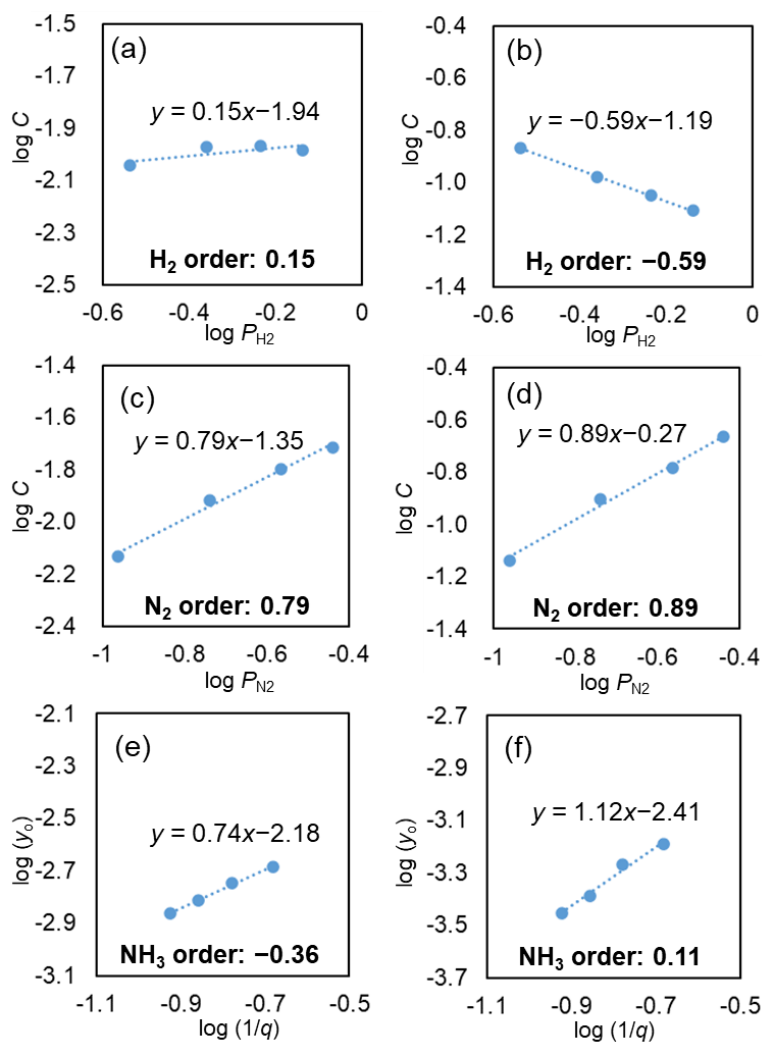

**Fig. S10.** Dependence of  $H_2$  partial pressure (a, b),  $N_2$  partial pressure (c, d), and flow rate (e, f) on the ammonia synthesis rates of Ru/Ba(10)-TiH<sub>2</sub> (a, c, e) and Ru-Cs/MgO (b, d, f) at 350 °C and 0.1 MPa. The reaction orders of the ammonia synthesis reaction were determined by the method reported by Aika et al.<sup>S2</sup>

### 3. Supplementary tables

**Table S1.** Structural data for BaTiO<sub>3-x</sub>H<sub>x</sub><sup>a</sup> in Ba(10)-TiH<sub>2</sub> obtained by the Rietveld refinement of the neutron diffraction pattern.

| Atom | Site       | <i>g</i> | <i>x</i> | <i>y</i> | <i>z</i> | <i>U</i> <sub>iso</sub> (Å <sup>2</sup> ) |
|------|------------|----------|----------|----------|----------|-------------------------------------------|
| Ba   | 1 <i>a</i> | 1        | 0        | 0        | 0        | 0.0050(6)                                 |
| Ti   | 1 <i>b</i> | 1        | 0.5      | 0.5      | 0.5      | 0.0050(6)                                 |
| O    | 3 <i>c</i> | 0.886(2) | 0        | 0.5      | 0.5      | 0.0079(5)                                 |
| H    | 3 <i>c</i> | 0.114(2) | 0        | 0.5      | 0.5      | 0.0079(5)                                 |

<sup>a</sup> Space group *Pm-3m* (No. 221), *a* = 4.01659(8) Å, *R*<sub>wp</sub> = 0.7173%, *R*<sub>p</sub> = 0.5601%, *S* = 4.9372.

**Table S2.** Elemental composition of Ba(*α*)-TiH<sub>2</sub> (*α* = 0, 1, 3, 5, 10, and 15) estimated from XPS analysis.

| Sample                  | Ba (3d <sub>5</sub> ) | Ti (2p) | O (1s) |
|-------------------------|-----------------------|---------|--------|
| Ba(0)-TiH <sub>2</sub>  | 0                     | 32.21   | 67.79  |
| Ba(1)-TiH <sub>2</sub>  | 6.99                  | 22.01   | 71.01  |
| Ba(3)-TiH <sub>2</sub>  | 9.06                  | 22.05   | 68.88  |
| Ba(5)-TiH <sub>2</sub>  | 11.26                 | 20.23   | 68.51  |
| Ba(10)-TiH <sub>2</sub> | 17.87                 | 15.00   | 67.13  |
| Ba(15)-TiH <sub>2</sub> | 19.57                 | 13.50   | 66.93  |

**Table S3.** Reaction conditions<sup>a</sup> and ammonia synthesis rates for kinetic analysis.

| Reaction order  | H <sub>2</sub> /N <sub>2</sub> ratio | Flow rate (mL min <sup>-1</sup> ) |                |    |       | NH <sub>3</sub> synthesis rate (mmol g <sup>-1</sup> h <sup>-1</sup> ) |           |
|-----------------|--------------------------------------|-----------------------------------|----------------|----|-------|------------------------------------------------------------------------|-----------|
|                 |                                      | H <sub>2</sub>                    | N <sub>2</sub> | Ar | Total | Ru/Ba(10)-TiH <sub>2</sub>                                             | Ru-Cs/MgO |
| H <sub>2</sub>  | 2                                    | 32                                | 16             | 62 | 110   | 0.87                                                                   | 0.24      |
|                 | 3                                    | 48                                | 16             | 46 | 110   | 0.98                                                                   | 0.18      |
|                 | 4                                    | 64                                | 16             | 30 | 110   | 0.99                                                                   | 0.15      |
|                 | 5                                    | 80                                | 16             | 14 | 110   | 0.96                                                                   | 0.13      |
| N <sub>2</sub>  | 5                                    | 60                                | 12             | 38 | 110   | 0.75                                                                   | 0.12      |
|                 | 3                                    | 60                                | 20             | 30 | 110   | 1.08                                                                   | 0.22      |
|                 | 2                                    | 60                                | 30             | 20 | 110   | 1.32                                                                   | 0.30      |
|                 | 1.5                                  | 60                                | 40             | 10 | 110   | 1.52                                                                   | 0.41      |
| NH <sub>3</sub> | 3                                    | 48                                | 16             | 16 | 80    | 1.34                                                                   | 0.21      |
|                 | 3                                    | 60                                | 20             | 20 | 100   | 1.46                                                                   | 0.22      |
|                 | 3                                    | 72                                | 24             | 24 | 120   | 1.50                                                                   | 0.20      |
|                 | 3                                    | 84                                | 28             | 28 | 140   | 1.56                                                                   | 0.20      |

<sup>a</sup> All data were collected at 350 °C and atmospheric pressure.

#### 4. References

S1 E. Roedel, A. Urakawa, S. Kureti and A. Baiker, *Phys. Chem. Chem. Phys.*, 2008, **10**, 6190.

S2 K. Aika, M. Kumasaka, T. Oma, O. Kato, H. Matsuda, N. Watanabe, K. Yamazaki, A. Ozaki and T. Onishi, *Appl. Catal.* 1986, **28**, 57.
